# Supplementary material for: Uncovering the Effect of European Policy-Making Initiatives in Addressing Nutrition-Related Issues: A Systematic Literature Review and Bibliometric Analysis on Front-of-Pack Labels
Source: MDPI journal article supplement (doi:10.3390/nu14163423), 2022-08-19
Supplement: s1 [file s1]

## SUPPLEMENTARY MATERIALS: Uncovering the Effect of European Policy-Making Initiatives in Addressing Nutrition-Related Issues: A Systematic Literature Review and Bibliometric Analysis on Front-of-Pack Labels

**Figure S1. 1989-2011: Discovering the relevance of nutrition-related information.**

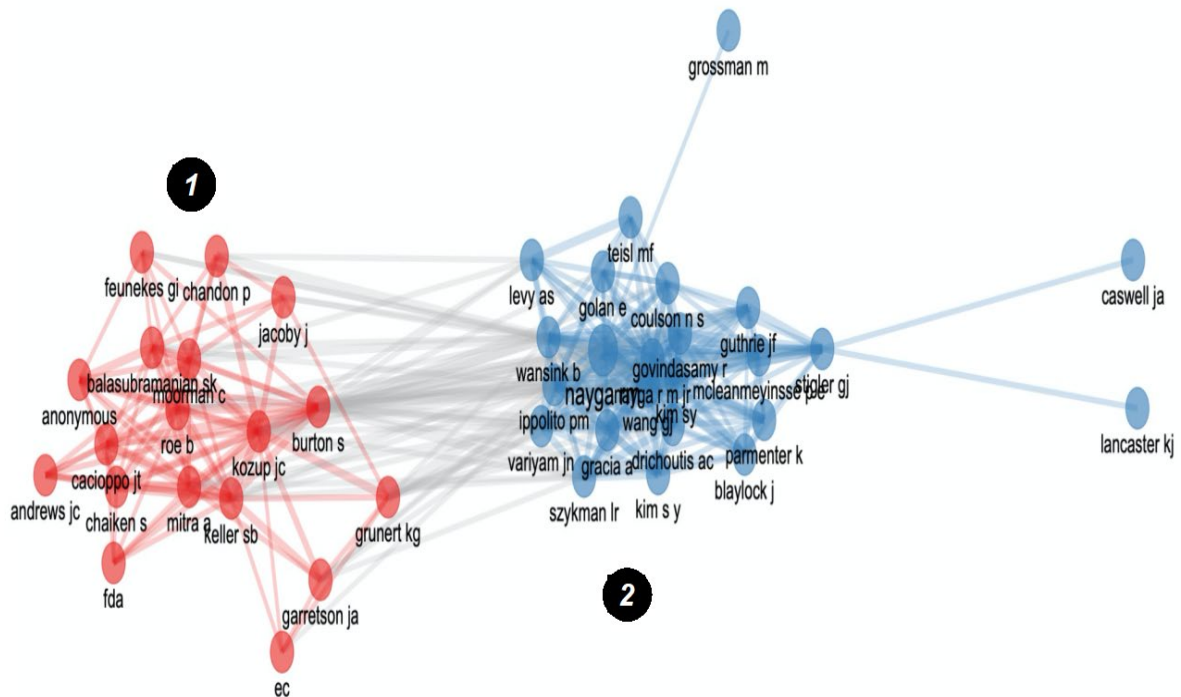

1989-2011: Discovering the relevance of nutrition-related information.

**Figure S2. 2012 – 2016 - The drivers of acceptance of Front-of-Pack labels**

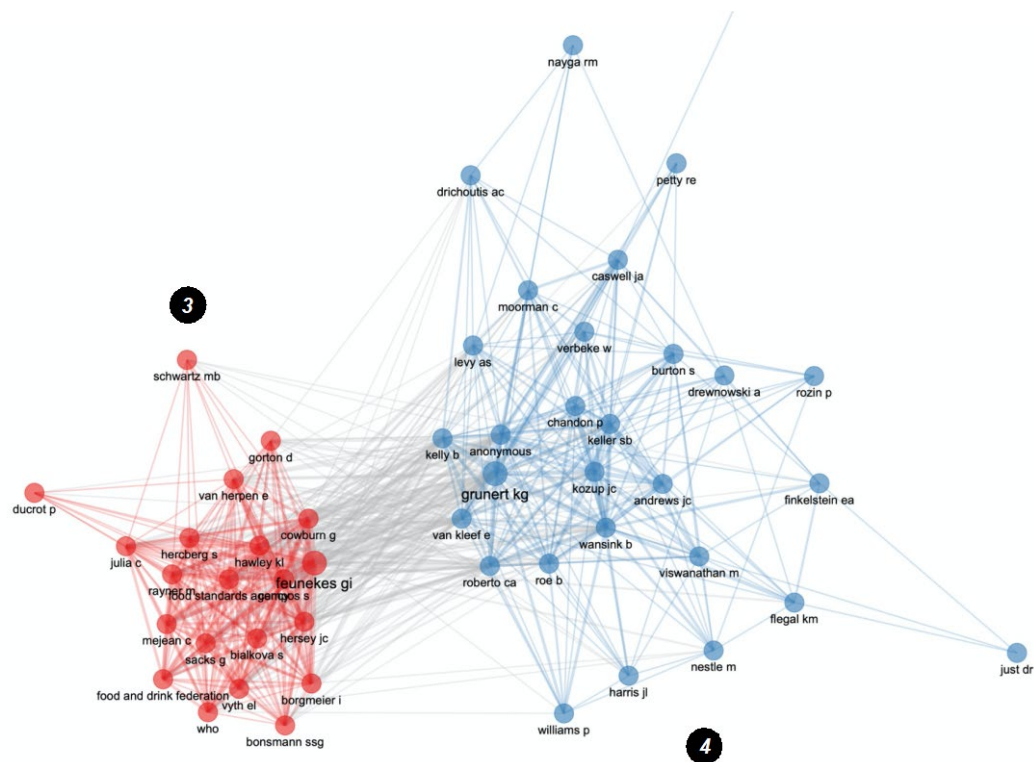

2012 – 2016 - The drivers of acceptance of Front-of-Pack labels.

**Figure S3. Period: 2017 – 2022 – Opening up to alternatives and challenging the mainstream**

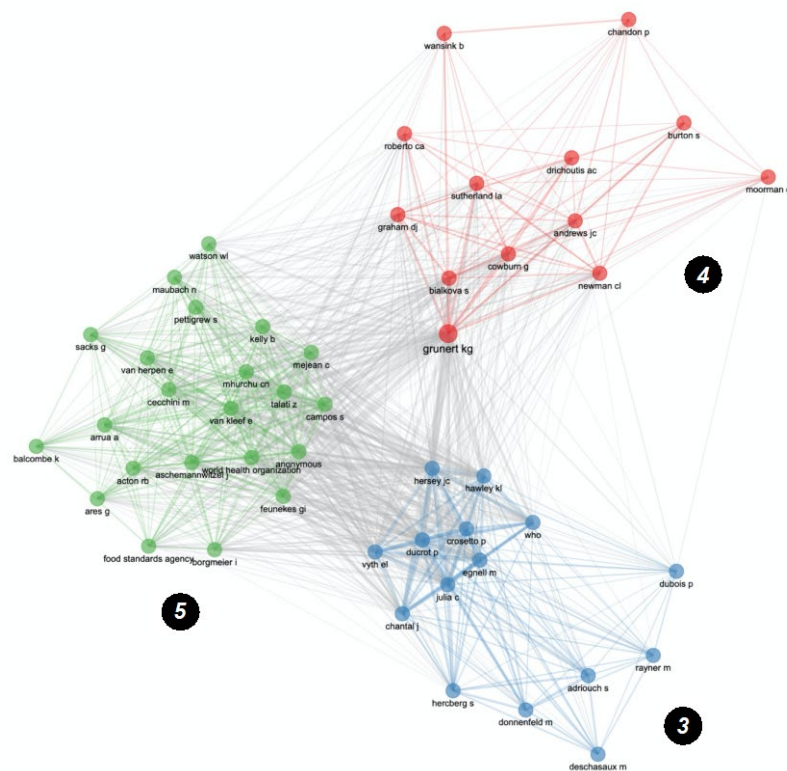

Period: 2017 – 2022 – Opening up to alternatives and challenging the mainstream.
